# Supplementary material for: Expression of Specific Alleles of Zinc-Finger Transcription Factors, HvSAP8 and HvSAP16, and Corresponding SNP Markers, Are Associated with Drought Tolerance in Barley Populations
Source: MDPI journal article supplement (doi:10.3390/ijms222212156), 2021-11-10
Supplement: s1 [file s1]

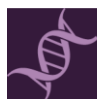

## Supplementary Materials

**Expression of specific alleles of Zinc-finger transcription factors, *HvSAP8* and *HvSAP16*, and corresponding SNP markers, are associated with drought tolerance in barley populations.** Baidyussen, A.; Jatayev, S.; Khassanova, G.; Amantayev, B.; Sereda, G.; Sereda, S.; Gupta, N.K.; Gupta, S.; Schramm, C.; Anderson, P.; Jenkins, C.L.D.; Soole, K.L.; Langridge, P.; Shavrukov, Y.

**Supplementary Material S1.** Published information about expression analysis of *HvSAP8* and *HvSAP16* homologs in monocot and dicot plant species in dehydration, salinity and other abiotic stresses.

| Species and references                                                                                            | Homologs to <i>HvSAP8</i> (A20-AN1)                                  |                                   |                                                          | Homologs to <i>HvSAP16</i> (AN1-C2H2)                                                |                                                                                                                                                |                       |
|-------------------------------------------------------------------------------------------------------------------|----------------------------------------------------------------------|-----------------------------------|----------------------------------------------------------|--------------------------------------------------------------------------------------|------------------------------------------------------------------------------------------------------------------------------------------------|-----------------------|
|                                                                                                                   | Dehydration                                                          | NaCl                              | Other                                                    | Dehydration                                                                          | NaCl                                                                                                                                           | Other                 |
| <b>Monocot plant species</b>                                                                                      |                                                                      |                                   |                                                          |                                                                                      |                                                                                                                                                |                       |
| Rice ( <i>Oryza sativa</i> ) indica, cv. Pusa Basmati 1 [4]                                                       | <i>OsSAP8</i> : Upregulated: 3.5-fold, (air-dry, 6 hrs)              | Upregulated: 3-fold (200 mM NaCl) | Cold. Non changed: =1.                                   | <i>OsSAP16</i> =2-fold                                                               | =1.5-fold                                                                                                                                      | Cold. Non changed: =1 |
| Rice ( <i>Oryza sativa</i> ) indica, cv. Jiucaiqing [10]                                                          | ZFP184 = <i>OsSAP8</i> = 2-fold (20% PEG 6000), 12 hrs               |                                   | Cold Non changed: = 1                                    |                                                                                      |                                                                                                                                                |                       |
| Rice ( <i>Oryza sativa</i> ) indica, cv. IR-50, 8-days-old [11]. Improve tolerance in transgenic tobacco and rice | <i>OsSAP8</i> : Strongly expressed (both 400 mM manutol and air-dry) | Strongly expressed (250 mM NaCl)  | Cold, heat, sub-merge, wounding – all strongly expressed |                                                                                      |                                                                                                                                                |                       |
| Rice ( <i>Oryza sativa</i> ) indica, cv. IR36, shoots, 14-days-old [12]                                           | <i>OsSAP8</i> : Up to 2.6-fold                                       | Up to 1.5-fold                    |                                                          |                                                                                      |                                                                                                                                                |                       |
| Bread wheat ( <i>Triticum aestivum</i> L.) [17]                                                                   |                                                                      |                                   |                                                          | <i>TaSAP17</i> (= <i>OsSAP16</i> ). Fluctuated up to 1.2 and down up to 0.5 around 1 | Up-regulated to 4- and 6-fold (leaves and roots) in salt tolerant cvs. Down regulated to 0.1 and 0.3 (leaves and roots) in salt sensitive cvs. |                       |
| Tall fescue ( <i>Festuca arundinacea</i> ) [13]                                                                   | <i>FaZnF</i> (= <i>OsSAP8</i> ): Highly expressed at 12-24 hrs       | Gradually increased and most      | Heat (40°C) – UV – wounding (12                          |                                                                                      |                                                                                                                                                |                       |

|                                                                                                      |                                                                                                                                                |                                                                                            |                                                                  |                                                                                                                        |                                                              |                                                            |
|------------------------------------------------------------------------------------------------------|------------------------------------------------------------------------------------------------------------------------------------------------|--------------------------------------------------------------------------------------------|------------------------------------------------------------------|------------------------------------------------------------------------------------------------------------------------|--------------------------------------------------------------|------------------------------------------------------------|
|                                                                                                      | (PEG6000 = 12.87%). Most highly expressed at 24-48 hrs (drought)                                                                               | highly expressed at 24 hrs (500 mM NaCl)                                                   | hrs) Highly expressed at 2/1hrs-24 hrs                           |                                                                                                                        |                                                              |                                                            |
| Foxtail millet ( <i>Setaria italica</i> L.), cv. Yugu 1 [14]                                         | <i>SiSAP4</i> (similar to <i>OsSAP4</i> ): Up-regulated to 4-fold at 1-3 hrs and gradually returned back to 1-1.5 at 12-24 hrs. (6% PEG-6000), | Up-regulated to 1.5-fold at 9 hrs and returned back to 0.8-1.2 at 12-24 hrs. (100 mM NaCl) | Cold. Two small peaks (1.5-fold) at 0.5 and 12 hrs               |                                                                                                                        |                                                              |                                                            |
| Banana ( <i>Musa acuminata</i> ) cv. Karibale Monthan [16]                                           | <i>MusaSAP1</i> = ( <i>HvSAP8</i> ). Up=2.0 (5, 15 hrs); down=1.4 (24 hrs) Drought                                                             | Up=2.2 (5 hrs); down=2 and 1.7 (15 and 24 hrs) (250 mM NaCl))                              | Up=2-3, cold; Up=3-10, heat; Up=1.8-2.2, wounding                |                                                                                                                        |                                                              |                                                            |
| Sugarcane ( <i>Saccharum officinarum</i> L.) cv. 'Badila'. Overexpression in transgenic tobacco [15] | <i>ShSAP1</i> = Up-regulated until 2-fold at 10 and 15 days                                                                                    | Similar to: <i>OsSAP8</i> . 1.8-2.2-fold (200-400 mM NaCl)                                 |                                                                  |                                                                                                                        |                                                              |                                                            |
| <b>Dicot plant species</b>                                                                           |                                                                                                                                                |                                                                                            |                                                                  |                                                                                                                        |                                                              |                                                            |
| Rapeseed ( <i>Brassica napus</i> ) [18]                                                              | <i>BnaA06g02460D</i> (= <i>AtSAP2</i> = <i>HvSAP8</i> ). Not changed = 0                                                                       | Not changed = 0                                                                            | Heat: Very high; Cold: Not changed = 0                           | <i>BnaA0936780D</i><br><i>BnaC08g28470D</i> (= <i>AtSAP13</i> = <i>HvSAP16</i> )<br>Not changed = 0                    | Not changed = 0                                              | Heat and cold: Not changed = 0                             |
| Cucumber ( <i>Cucumis sativus</i> var. <i>sativus</i> ), line 9930 [45]                              | <i>CsSAP11</i> – closest to <i>AtSAP2</i> (High expression in all non-stressed tissues)                                                        |                                                                                            |                                                                  | <i>CsSAP6</i> – closest to <i>AtSAP11</i> : 6-fold increase until 12 hrs and drop to 1.5-fold at 24 hrs. 10% PEG-6000) | Gradually increase to 8-fold until end (24 hrs). 200 mM NaCl | Cold: 2.7-fold increase until 12 hrs and steady            |
| Tomato ( <i>Solanum lycopersicum</i> ) [46]                                                          | All <i>Sl</i> genes with specific <i>SlSAP2</i> , 3, 4 and 5 (all closest homologs to <i>OsSAP8</i> ). Up=1.8                                  | Up=5                                                                                       | Cold-Heat: Up=1.5; down=0.6; Wound-Submergence: Down=0.5; up=1.5 | <i>SlSAP12</i> – closest homolog to <i>AtSAP11</i><br>Up=1.2                                                           | Up=1.7                                                       | Cold-Heat: Down=0.6 and 0.7; Wound-Submergence: Up=1.3&1.5 |

|                                                                                                |                                                                                                                                                            |                                                                                          |                                                                                        |                                                                                                                               |                                                                               |                                                             |
|------------------------------------------------------------------------------------------------|------------------------------------------------------------------------------------------------------------------------------------------------------------|------------------------------------------------------------------------------------------|----------------------------------------------------------------------------------------|-------------------------------------------------------------------------------------------------------------------------------|-------------------------------------------------------------------------------|-------------------------------------------------------------|
| Castor bean ( <i>Ricinus communis</i> ) [21]                                                   | <i>RcSAP4</i> – closest to <i>AtSAP2</i> : Down to 0.5 (3 hrs), up to 1.5 (6 hrs) and down again (12 hrs) 20% PEG-6000)                                    | Gradually up to 1.5 (300 mM NaCl)                                                        | Heat, 50°C: Gradually up to 7 (6 hrs) and return (12 hrs); Cold: Gradually down to 0.5 | <i>RcSAP9</i> – closest homolog to <i>AtSAP11</i> . Strongly down to 0.1-0.2                                                  | Up to 14 and down to 0.5                                                      | Heat, 50C: Up to 1.6 in the middle; Cold: Gradually up to 7 |
| <i>Medicago truncatula</i> [22]                                                                | <i>MtSAP4</i> , -13 – closest homolog to <i>HvSAP8</i> - Gradually up to 6 and 3 (12 hrs) (whole seedlings on paper towel)                                 | Gradually down to 0.5 (12 hrs) (300 mM NaCl)                                             | Cold: No changes and slightly up to 2 (12 hrs)                                         | <i>MtSAP16</i> ; -17 – closest homolog to <i>HvSAP16</i> - No changes                                                         | No changes                                                                    | Cold - No changes                                           |
| Soybean ( <i>Glycine max</i> ) [47]                                                            | <i>GmSAP10</i> ; -13; -18; -19 - all closest homologs to <i>OsSAP8</i> : Up gradually to 10-, 13-, 13-, 4.5-fold (at 24 hrs) (whole plants on paper towel) | Up gradually to 2.2, 1.4, 2.5, 3.2 (at 8-12 hrs) (250 mM NaCl)                           |                                                                                        | <i>GmSAP1</i> ; -2; -9 - all closest homologs to <i>OsSAP16</i> : Up gradually to 9-, 22-, 7-fold (at 8-12 hrs)               | Up gradually to 4, 2.5, 5 (at 8-12 hrs)                                       |                                                             |
| Cotton, tetraploid ( <i>Gossypium hirsutum</i> ) [19]                                          | <i>GhSAP1</i> ; -12; -16 - all closest homologs to <i>OsSAP8</i> : Up to 2-, 0-, 2-fold. Heatmap: All three little up at 1 h and down after (PEG, 20%)     | Up to 5-, 2-, 2-fold. Heatmap: All three strongly up at 1 h and down after (300 mM NaCl) |                                                                                        | <i>GhSAP11</i> - closest homologs to <i>OsSAP16</i> : Down, 5-fold. Heatmap: neutral, little down (6 hrs) and little (12 hrs) | Up to 4-fold. Heatmap: Strong up at 1 and 12 hrs; and moderate at 3 and 6 hrs |                                                             |
| Peach ( <i>Prunus persica</i> ), non-dormancy buds, two cultivars, budsticks cut in water [48] | <i>PpSAP1</i> = <i>OsSAP4</i> and <i>OsSAP8</i> = Significantly increased to 1.4-1.6-fold in Day1 and Day 3 (removed water)                                | Significantly increased to 1.2-1.5-fold in Day1 and Day 3 (200 mM NaCl)                  |                                                                                        |                                                                                                                               |                                                                               |                                                             |
| Kashgar tamarisk ( <i>Tamarix hispida</i> ), woody halophyte, (Log <sub>2</sub> scale) [20]    | <i>ThSAP2</i> ; -10 - closest homologs to <i>OsSAP8</i> – Up to 2 (leaves) and mixed -2 - +3 (roots) (20% PEG)                                             | Up to 2 (leaves) and mixed -0.5 - +1 (roots) (150 mM NaCl)                               |                                                                                        | <i>ThSAP7</i> - closest homologs to <i>OsSAP16</i> – Up to 1 (leaves) and mixed -0.5 - +2 (roots)                             | weak up 1 (leaves), weak down -1 (roots)                                      |                                                             |

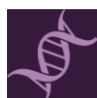

**Supplementary Material S2.** Annotated sequence accessions of Morex, Barke and Bowman in databases with the promoter regions of *HvSAP8* and *HvSAP16* genes. Primers designed and used for sequences are highlighted in blue. Start codon of the coding regions are shown in green. The identified SNPs in the studied barley germplasms are designated in red.

## *HvSAP8*

>Morex\_contig\_273714 CAJW010273714 carma=7HL POPSEQ: chr=7H

cM=85.9773371104815 (Promoter area = 1.180 bp)

```
CCACACCCACGGCGGGGACGGCCGAGAATGAGAGAAAAAAATATCGGCGCGGGGCCCTGGAGGGGCCCCCGTCATTCCCCCG
CTGCCCCCCTCTCTCTCCCTTTTATCCCTCCGCCACCTCCCCACGTTTCGCCCCCATTTTGAAGCCCACCGAATTCCTCGCGATTCC
TCTCCCCTCGCCTCCTCGTCCTCCCCCTCCTAGGGTTAGTACCCCTCCCCTCCCCTCCCCCGGATTCCACCGCGGGTCGACCTCT
CCCCCGGATCCGCCTCCAGATTTAGGGCTCCGGCTCCGCCGATCCGGGCTCGTTCTTTTCCGCCGGAGCTTTTCCGTCGCTGATGA
TTTCTTGTTGTTGGGTCCGTGTGCAGGGATCGCCGAGAGGAATCGCGACGAGGGCTTCCCTCTATCAGGTTTCGTGGCTCGCCGACC
CTCCGTTCCCGGTGATAATCATCTGTCTTCCCTAGGAAGTTCTGCCATAGCCTCTCTGTGCTTTTATTTATTCCTCTCTGGTCAAAAATC
CCTGATTTTCTCTGCGCGTCGATTCCCTCCGGCCGCACCAGAAGCCACCGGCCGGGTACCGATTGTTGGCTCGACGTTCAATTCCGG
CAGAACCGCGACGAGCCACGGCCAAATTCGGCGCTCCGATGCAGTAAAGGCGGCCGGCCTCCTTTACACGTATCCGTCCGGTGTGTT
TGTTGCCGCGGCCGGTTGTTGATGCGGCCGCTTTCGCAAAAGTTAGTGCGCGGATACGGTTTGCTACTTTACGGATTTGTTGCCGCT
GTTGCGTAAAGCGGCGTAAAGTCGGGGCCTTTCTTTAGAATTAAATTTCCCCTGCTCTGCTCCGATGCCGGTAGGTGATTAGGCCGC
TGTTGGCTAATTATAAGCCAGGCAGGTTGCATCGTTTAGTGCTGGTGCCTTCAGCTCTGTGTTTGACCAAGCAGCCACCACCTATCCT
TTTGTAAGATGCTTCTGTAGAGCACCTTGCTTTACCAGAGTTGGATTTCAGTAGGCTAAAACATACTGTATGTTTGAAGATTATGCCAT
GTTTCATCTCTAAATTGTTAAAGCCGAGTGATTGTTGCAAAATACTTACAGTTTGTGCCTTGCTGTTTATCATAGCCCTTGTGGGTT
TTGTTGTGTTGACCGTGTTGTGTCTGGTTTGTAGTTAATTAACCAAAGCCATGGAGCACAAGGAGACGGGCTGCCAGTCACGGGAGG
GTCCGATCCTTTGCGTCAATAACTGCGGCTTCTTTGGCAGCG
```

>Bowman\_contig\_10544 CAJX010009841 carma=7HL (Promoter area = 1,180 bp)

```
CCACACCCACGGCGGGGACGGCCGAGAATGAGAGAAAAAAATATCGGCGCGGGGCCCTGGAGGGGCCCCCGTCATTCCCCCG
CTGCCCCCCTCTCTCTCCCTTTTATCCCTCCGCCACCTCCCCACGTTTCGCCCCCATTTTGAAGCCCACCGAATTCCTCGCGATTCC
TCTCCCCTCGCCTCCTCGTCCTCCCCCTCCTAGGGTTAGTACCCCTCCCCTCCCCTCCCCCGGATTCCACCGCGGGTCGACCTCT
CCCCCGGATCCGCCTCCAGATTTAGGGCTCCGGCTCCGCCGATCCGGGCTCGTTCTTTTCCGCCGGAGCTTTTCCGTCGCTGATGA
TTTCTTGTTGTTGGGTCCGTGTGCAGGGATCGCCGAGAGGAATCGCGACGAGGGCTTCCCTCTATCAGGTTTCGTGGCTCGCCGACC
CTCCGTTCCCGGTGATAATCATCTGTCTTCCCTAGGAAGTTCTGCCATAGCCTCTCTGTGCTTTTATTTATTCCTCTCTGGTCAAAAATC
CCTGATTTTCTCTGCGCGTCGATTCCCTCCGGCCGCACCAGAAGCCACCGGCCGGGTACCGATTGTTGGCTCGACGTTCAATTCCGG
CAGAACCGCGACGAGCCACGGCCAAATTCGGCGCTCCGATGCAGTAAAGGCGGCCGGCCTCCTTTACACGTATCCGTCCGGTGTGTT
TGTTGCCGCGGCCGGTTGTTGATGCGGCCGCTTTCGCAAAAGTTAGTGCGCGGATACGGTTTGCTACTTTACGGATTTGTTGCCGCT
GTTGCGTAAAGCGGCGTAAAGTCGGGGCCTTTCTTTAGAATTAAATTTCCCCTGCTCTGCTCCGATGCCGGTAGGTGATTAGGCCGC
TGTTGGCTAATTATAAGCCAGGCAGGTTGCATCGTTTAGTGCTGGTGCCTTCAGCTCTGTGTTTGACCAAGCAGCCACCACCTATCCT
TTTGTAAGATGCTTCTGTAGAGCACCTTGCTTTACCAGAGTTGGATTTCAGTAGGCTAAAACATACTGTATGTTTGAAGATTATGCCAT
GTTTCATCTCTAAATTGTTAAAGCCGAGTGATTGTTGCAAAATACTTACAGTTTGTGCCTTGCTGTTTATCATAGCCCTTGTGGGTT
TTGTTGTGTTGACCGTGTTGTGTCTGGTTTGTAGTTAATTAACCAAAGCCATGGAGCACAAGGAGACGGGCTGCCAGTCACGGGAGG
GTCCGATCCTTTGCGTCAATAACTGCGGCTTCTTTGGCAGCG
```

*HvSAP16*[illegible]

>Barke\_contig\_2792434 CAJV012605985 carma=2HS (Promoter area = 790 bp)

CCCCCCCCCCCCCTCGATTCTCATCCCAACATGCAGTCCCTACATATATTAATCTGGCGATGCTTACCTGAAGTATCTGTTTAAAA  
ACTATAAAGTGTGGCAGAATTTTGAATACTGACTAAATATAAGAGATGCAAAATCCTTTCTTTTCGCTCAAATGTATTCAATCCTT  
CTGGACTTCCTGACTTTCTTAATATGAAAATAAGATTGCACATTTGTACTGAGGATGGTAGTTATTTATAGCGATTAGTAAAGATTG  
CACGCGATTAGTTGAAGCTTGTCCAACATCGTCTGAGATGGTTTGGGCATATTCAGCGCAGGCCCTCCAGAAGCCCCAGTGCATAGCGG  
ACGGCTAAAGCATTGTTGATAATGTCAAGAGAGGCCAGGGTAGACCGAATTTGACATGAGAAGAGTCCGTAAAGAGAGATCTAAAGG  
ATTGGAGCATCACCAAAGAACTAGCCATGGACTGGGCTGCGTGGAAGCTTGCTATCCATGTGNNNNAACCATGAGTTGGTCGCGAGA  
TCTAATGGGTTTCACCTCTAGCCTACCCNNNNNNNNNNNNNNNNAAGGCTTTGTTGTTGTTGTTGTTGGTAGTGAAGAGTGAAGTTT  
TTTGCTGAGTTAACTGTATTCAACTTTTTTTTTCACAGAATATGTAGTATTTTATTCTTATGGAAATTGATTCCATTTTACCTTCTGA  
AACTATTTTGTCTTTTGAATGCACTGGCACCTTAATTATAATAGTTCTGTGCATCACCAAGTGCAGCCAGCCATTGTGCTAATATGG  
CTATTGTATGATTGTTTCAGGTCTTTTGCCTTCAGCACCGAAGTTATACATCACATAA

---

## Supplementary Material S3. Sequences of the Universal probes and primers used in ASQ and Amplifluor-like methods [31, 32].

### ASQ molecular probes and allele-specific primers

#### Universal Probes (5'-3'):

Uni-ASQ-1: **FAM**-ccagctgaacggt**TCGACC**

Uni-ASQ-2: **HEX**-ccagctgaacggt**ACCTGC**

Uni-ASQ-Q: *accgttcagctgg-Q*

#### Allele-specific primers (5'-3'):

HvSAP8-ASQ-F1: ccagctgaacggt**TCGACC**-GAAGTTCTGCCATAGCCTCT**G**T

HvSAP8-ASQ-F2: ccagctgaacggt**ACCTGC**-GAAGTTCTGCCATAGCCTCT**C**T

HvSAP8-ASQ-R1: GAATCGACGGCCAGAGGAAAAT

Amplicon size = 78 bp

HvSAP16-ASQ-F1: ccagctgaacggt**TCGACC**-AGACGATGTTGGACAAGCTT**TC**

HvSAP16-ASQ-F2: ccagctgaacggt**ACCTGC**-AGACGATGTTGGACAAGCTT**AC**

HvSAP16-ASQ-R: GCACATTTGTACTGAGGATGGTAG

Amplicon size: 83 bp

### Amplifluor-like molecular probes and allele-specific primers

#### Universal Probes (5'-3'):

Uni-1: **FAM**-AGCGATGCGTTCGAGCATCGC (T\*-**BHQ1**) gaaggt**GACCAAGTTCATGCT**

Uni-2: **HEX**-AGGACGCTGAGATGCGTCC (T\*-**BHQ1**) gaaggt**CGGAGTCAACGGATT**

#### Allele-specific primers (5'-3'):

HvSAP8-Amp-F1: gaaggt**GACCAAGTTCATGCT**-GAAGTTCTGCCATAGCCTCT**G**

HvSAP8-Amp-F2: gaaggt**CGGAGTCAACGGATT**-GAAGTTCTGCCATAGCCTCT**C**

HvSAP8-Amp-R: GAATCGACGGCCAGAGGAAAAT

Amplicon size = 78 bp

HvSAP16-Amp-F1: gaaggt**GACCAAGTTCATGCT**-AGACGATGTTGGACAAGCTT**T**

HvSAP16-Amp-F2: gaaggt**CGGAGTCAACGGATT**-AGACGATGTTGGACAAGCTT**A**

HvSAP16-Amp-R: GCACATTTGTACTGAGGATGGTAG

Amplicon size = 83 bp

---

**Supplementary Material S4.** Sequences of primers qPCR used in this study.

| Name           | Sequence (5'-3')         | Amplicon size (bp) |
|----------------|--------------------------|--------------------|
| HvSAP8-qPCR-F  | CCTCCTCTTTTGACAGCATCGTC  | 136                |
| HvSAP8-qPCR-R  | GGACCAGCGATGTCAGCAGG     |                    |
| HvSAP16-qPCR-F | AGTTCCTGGGTGCAGAGAAGCA   | 208                |
| HvSAP16-qPCR-R | GGAAGAACTACTGCTACTGCTGTT |                    |
| HvADP-qPCR-F   | GCTCTCCAACAACATTGCCAAC   | 77                 |
| HvADP-qPCR-R   | GAGACATCCAGCATCATTCATTCC |                    |
| HvGAPD-qPCR-F  | GCCAAGACCCAGTAGAGC       | 78                 |
| HvGAPD-qPCR-R  | CACATTTATTCCCATAGACAAAGG |                    |
